# Supplementary material for: Replication of a Dog-Origin H6N1 Influenza Virus in Cell Culture and Mice
Source: MDPI journal article supplement (doi:10.3390/v12070704), 2020-06-30
Supplement: s1 [file s1]

Supplementary File

**Supplementary Table S1.** The sequence analysis results showing the different nucleotides and the resultant amino acids between E01EE and E01GK.

| Viruses | The nucleotides and the resultant amino acid <sup>a</sup> |                  |                  |                  |
|---------|-----------------------------------------------------------|------------------|------------------|------------------|
|         | PB1 position 78                                           | PB1 position 218 | PB1 position 739 | PB2 position 627 |
| E01EE   | GAG (E)                                                   | TTA (L)          | GAG (E)          | GAG (E)          |
| E01GK   | GAA (E)                                                   | CTA (L)          | GGG (G)          | AAG (K)          |

<sup>a</sup>: E: Glutamic acid; L: Leucine; G: Glycine; K: Lysine

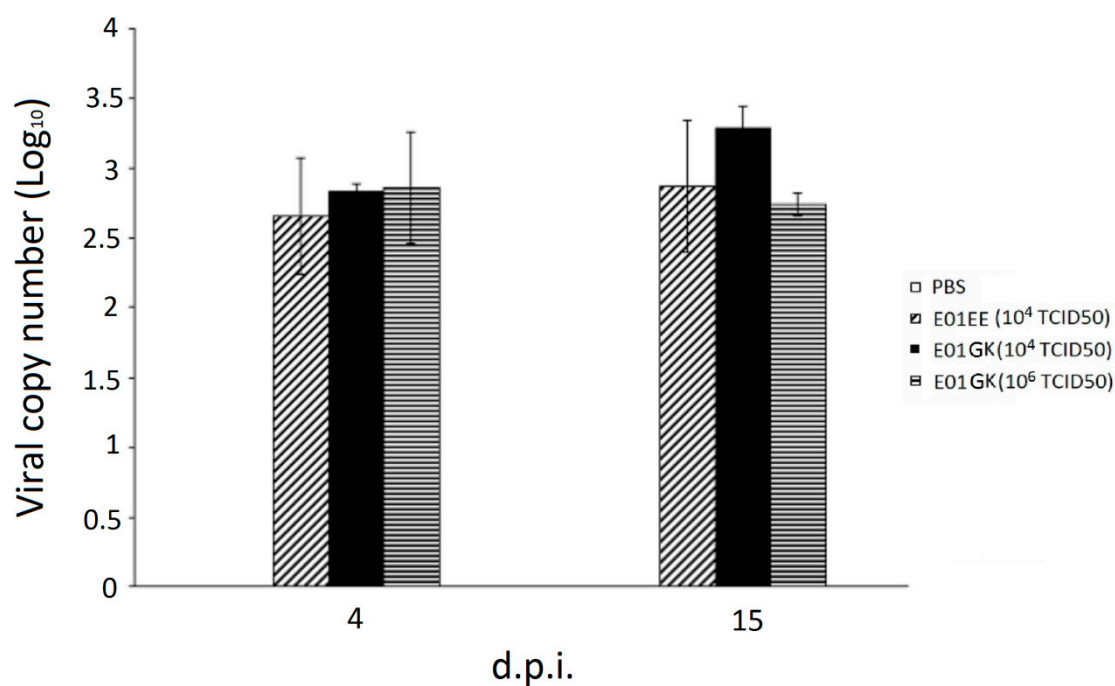

**Supplementary Figure S1.** The virus quantification from blood samples using qRT-PCR. No detectable signals were noted in the negative PBS control group. Mice were inoculated intranasally with 10<sup>4</sup> TCID<sub>50</sub>/mL of E01EE, 10<sup>4</sup> TCID<sub>50</sub>/mL of E01GK, 10<sup>6</sup> TCID<sub>50</sub>/mL of E01GK or PBS in a 50 µL volume (25 µL per nostril). d.p.i.: days post inoculation.

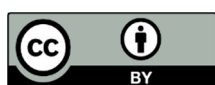

© 2020 by the authors. Licensee MDPI, Basel, Switzerland. This article is an open access article distributed under the terms and conditions of the Creative Commons Attribution (CC BY) license (<http://creativecommons.org/licenses/by/4.0/>).
